# Supplementary material
Source: Research Square preprint supplement (doi:10.21203/rs.3.rs-9577826/v1)
Supplement: Supplementary file 1 [file e0c59c7244776030e556bb44.docx]

| ***Author and Year*** | **Study Design** | **Quality Rating** | **Age Category** | **No. of CLABSIs** | **No. of MBI LCBI**  **s amon gst CLA**  **BSIs** | **No. of Pediatri c Patients** | **MBI- LCBIs**  **in Pediatri c Patients** | **Most commonly associated conditions with MBI-LCBI** | **No. of patients who have MBI-LCBI**  **and the Associated condition** | **Geography of study** |
| --- | --- | --- | --- | --- | --- | --- | --- | --- | --- | --- |
| ***A.Vaughan, 2017*** | Retrospective Observational Study | Moderate | Pediatric | 114 | 68 | 114 | 68 | Hematological malignancies | 60 | - |
| ***Altounji, 2020*** | Quasi-Experimental Study | Low | Pediatric | 16 | 8 | 16 | 8 | Cancer (Unspecified) | - | North America |
| ***C. Dandoy, 2020*** | Retrospective Observational Study | High | Pediatric and Adult | 16,875 | 2,194 | N/A | N/A | Hematologic malignancies | 1,801 | - |
| ***Chaftari 2016*** | Retrospective Observational Study | Moderate | Adult | 149 | 63 | - | - | - | - | North America |
| ***Coffin SE***  ***,2014*** | Retrospective Cohort Study | High | Pediatric | 410 | 78 | 410 | 78 | Active intraabdominal pathology | 78 | North America |
| ***D. Torres, 2016*** | Retrospective Cohort Study | Moderate | Pediatric | 55 | 24 | 55 | 24 | Hematologic malignancies | 18 | - |
| ***Dahan CE, 2016*** | Retrospective matched case– control study | High | Pediatric | 120 | 27 | 120 | 27 | Active intraabdominal pathology | 10 | North America |
| ***Dandoy CE,***  ***2016*** | Retrospective Cohort Study | High | Pediatric | 170 | 80 | 170 | 80 | Immunodeficiency | 26 | North America |
| ***de Jonge, 2024*** | Prospective Observational Study | High | Adult | 129 | 63 | - | - | Hematological malignancies | 63 | Netherlands/Europe |
| ***de Mooij, 2020*** | Prospective Observational Study | High | Adult | 289 | 164 | - | - | Hematological malignancies | - | Netherlands/Europe |
| ***de Mooij, 2022*** | Retrospective Cohort  Study | High | Adult | 268 | 179 | - | - | Hematological malignancies | 179 | Netherlands/Europe |
| ***El Boghdadly, 2022*** | Retrospective Observational Study | Moderate | Adult | 115 | 115 | - | - | Hematological malignancies | 66 | North America |

| ***Fares, 2019*** | Retrospective Cohort  Study | High | Adult | 300 | 100 | - | - | Hematological malignancies | 90 | North America |
| --- | --- | --- | --- | --- | --- | --- | --- | --- | --- | --- |
| ***Gaur AH, 2017*** | Prospective Cohort Study | High | Pediatric | 694 | 353 | 694 | 353 | Hematologic malignancies | 353 | North America |
| ***Gavin, 2023*** | Retrospective Cohort  Study | High | Adult | 807 | 72 | - | - | Hematological malignancies | - | Australia |
| ***Giri v, 2021*** | Prospective Cohort Study | High | Adult | 192 | 21 | - | - | Hematological malignancies | - | North America |
| ***H.Awadh ,***  ***2021*** | Retrospective Cohort Study | High | Adult | 233 | 132 | - | - | Hematological malignancies | 130 | - |
| ***I. See, 2017*** | Retrospective surveillance  study | Moderate | Pediatric and Adult | 19,130 | 2,017 | 3,320 | 414 | Hematological malignancies | 1499 | - |
| ***L. Epstein, 2016*** | Descriptive surveillance study (Cross-sectional) | Moderate | Pediatric and Adult | 3,162 | 1,415 | N/A | N/A | Hematological malignancies | 1120 | - |
| ***Lazarow H,***  ***2023*** | Observational study | High | Adult | 166 | 117 | - | - | Hematological malignancies | 117 | North America |
| ***Linder, 2018*** | Descriptive Cohort Study | Moderate | Pediatric and Adult | 156 | 107 | N/A | N/A | Hematological malignancies | - | North America |
| ***M.Kamboj, 2014*** | Retrospective observational study (Case Series) | Moderate | Adult | 11 | 9 | - | - | Hematological malignancies | 7 | North America |
| ***M.Liu, 2025*** | Observational retrospective cohort | High | Adult | 46 | 24 | - | - | Hematological malignancies | 24 | China |
| ***Metzger, 2014*** | Retrospective cohort study. | Moderate | Adult | 66 | 47 | - | - | Hematological malignancies | - | North America |
| ***Puin de Silva, 2023*** | Retrospective cohort study | Moderate | Adult | 339 | 51 | - | - | Hematological malignancies | 51 | Brazil/South America |
| ***Van den bosch,***  ***2024*** | retrospective cohort study | Moderate | Pediatric | 50 | 7 | 50 | 7 | Hematological malignancies | 7 | Netherlands/Europe |
| ***Y. Kato, 2018*** | Retrospective observational study | Moderate | Adult | 44 | 20 | - | - | Hematological malignancies | 20 | Japan |

TABLE 1: STUDY CHARACTERISTICS
