# Supplementary material
Source: Research Square preprint supplement (doi:10.21203/rs.3.rs-9577826/v1)
Supplement: Supplementary file 2 [file e1a785155148e8c821eb25aa.docx]

| Database | Last Search Date | Search Strategy | Filters Applied | Results |
| --- | --- | --- | --- | --- |
| PubMed (MEDLINE) | 2nd April 2026 | ("MBI-LCBI"[tiab] OR "mucosal barrier injury"[tiab] OR "intestinal permeability"[tiab] OR "gut barrier"[tiab] OR "gut translocation"[tiab] OR "bacterial translocation"[tiab] OR "mucosal injury"[tiab] OR "mucositis"[tiab]) AND ("bloodstream infection"[tiab] OR bacteremia[tiab] OR sepsis[tiab] OR infection[tiab] OR "central line-associated bloodstream infection"[tiab] OR CLABSI[tiab]) OR (("Neoplasms"[MeSH] OR cancer[tiab] OR oncology[tiab] OR leukemia[tiab] OR lymphoma[tiab]) AND ("bacteremia"[MeSH] OR bacteremia[tiab] OR "bloodstream infection"[tiab] OR sepsis[tiab])) OR (("Hematopoietic Stem Cell Transplantation"[MeSH] OR HSCT[tiab] OR transplant[tiab]) AND (bacteremia[tiab] OR "bloodstream infection"[tiab] OR sepsis[tiab]`)) | Humans, English | ***2259*** |
| Embase | 2nd April 2026 | ('mucosal barrier injury':ti,ab,kw OR 'mucosal barrier injury laboratory confirmed bloodstream infection':ti,ab,kw OR 'MBI-LCBI':ti,ab,kw) AND ('bloodstream infection':ti,ab,kw OR bacteremia:ti,ab,kw) | Humans, English | ***102*** |
